# Supplementary material for: Preparation of metallic pivot-based imprinted monoliths with a hydrophilic macromonomer
Source: Royal Society of Chemistry journal article supplement (doi:10.1039/c5ra02699g), 2015-01-01
Supplement: c5ra02699g1.pdf [file c5ra02699g1.pdf]

## Electronic Supplementary Information (ESI)

### Preparation of metallic pivot-based imprinted monolith with hydrophilic macromonomer

Xiu-Yuan Li <sup>a,b</sup> Yan-Ping Huang <sup>a,b</sup> Zhao-Sheng Liu <sup>\*, a,b</sup> Haji Akber Aisa <sup>\*</sup>,

<sup>a,b</sup>

*<sup>a</sup>Key Laboratory of Plant Resources and Chemistry of Arid Zone, Xinjiang Technical Institute of Physics and Chemistry, Chinese Academy of Sciences, 40-1 South Beijing Road, Urumqi 830011, Xinjiang, China*

*<sup>b</sup>State Key Laboratory Basis of Xinjiang Indigenous Medicinal Plants Resource Utilization, Xinjiang Technical Institute of Physics and Chemistry, Chinese Academy of Sciences, Urumqi 830011, China*

Correspondence: Dr. Zhao-Sheng Liu

Fax: (+086)-022-23536746

E-mail: [zhaoshengliu@sohu.com](mailto:zhaoshengliu@sohu.com)

Correspondence: Haji Akber Aisa

E-mail: [haji@ms.xjb.ac.cn](mailto:haji@ms.xjb.ac.cn)

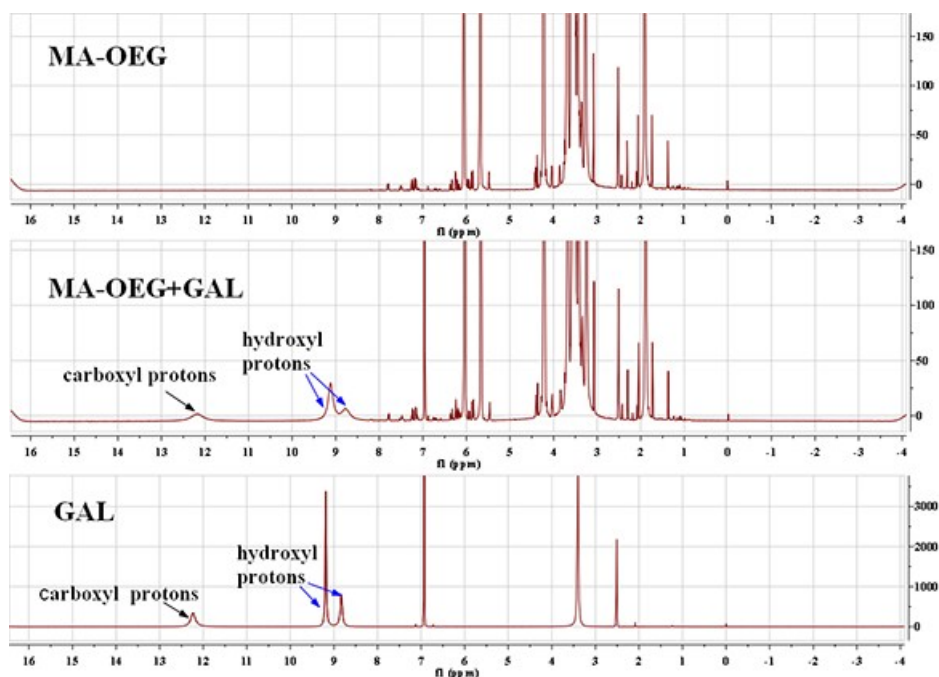

**Fig. S1.** <sup>1</sup>H NMR spectra in CDCl<sub>3</sub> with the pseudo-pre-polymerization: (a) oligo(ethyleneglycol) methyl ether methacrylate (MA-OEG); (b) MA-OEG + Gallic acid (GAL); (c) GAL

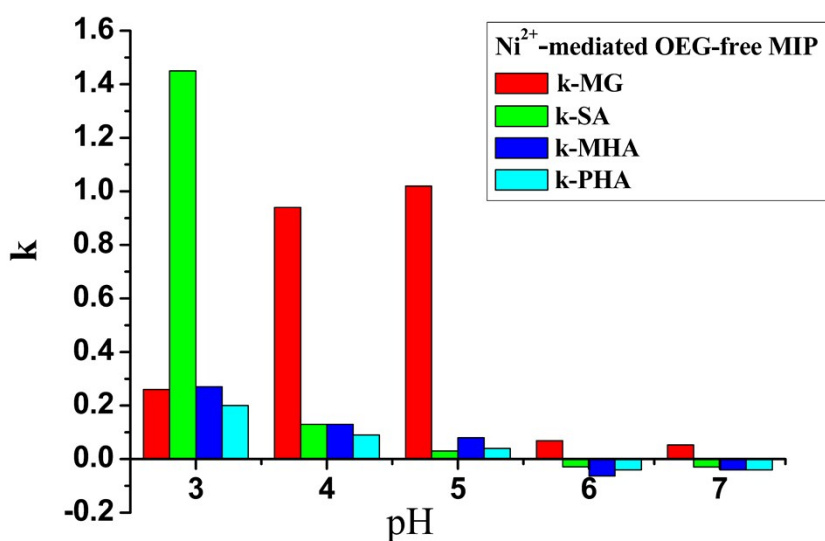

**Fig. S2.** Influence of the pH value of mobile phase on the retention factors and imprinting factor of GA analogues on the Ni<sup>2+</sup>-mediated OEG-free MIP (C15). HPLC conditions: column temperature, 25 °C; mobile phase, acetonitrile/acetate buffer (50 mmol L<sup>-1</sup>) (70/30, v/v); flow rate, 0.5 mL min<sup>-1</sup>; detection wavelength, 271 nm; injected volume, 20 μL.

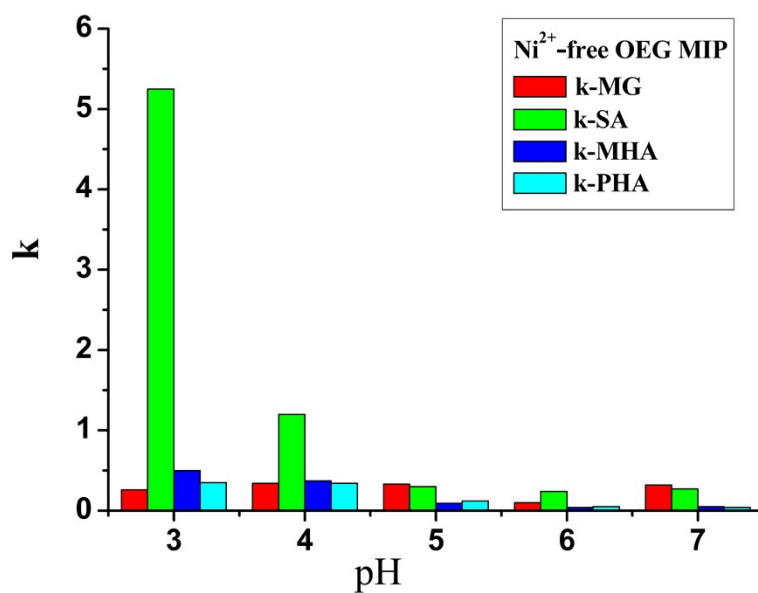

**Fig. S3.** Influence of the pH value of mobile phase on the retention factors and imprinting factor of GA analogues on the Ni<sup>2+</sup>-free OEG MIP (C5). HPLC conditions: column temperature, 25 °C; mobile phase, acetonitrile/acetate buffer (50 mmol L<sup>-1</sup>) (70/30, v/v); flow rate, 0.5 mL min<sup>-1</sup>; detection wavelength, 271 nm; injected volume, 20 μL.

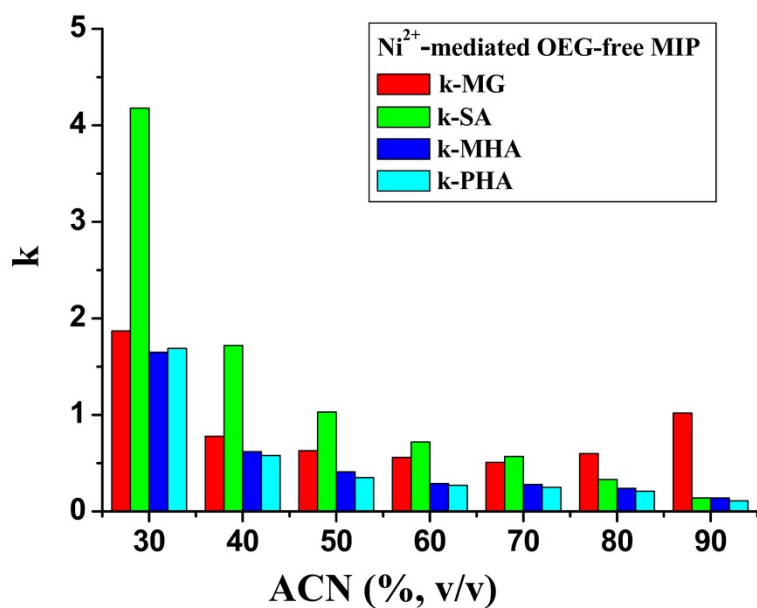

**Fig. S4.** Influence of the ACN content of mobile phase on the retention factors and imprinting factor of GA analogues on the Ni<sup>2+</sup>-mediated OEG-free MIP (C15). HPLC conditions: column temperature, 25 °C; mobile phase, acetonitrile/acetate buffer (50 mmol L<sup>-1</sup>) (70/30, v/v); flow rate, 0.5 mL min<sup>-1</sup>; detection wavelength, 271 nm; injected volume, 20 μL.

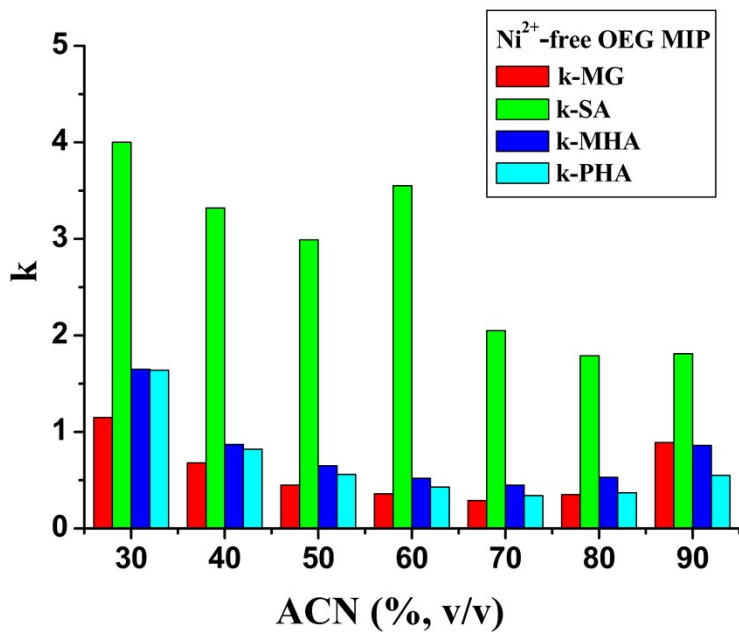

**Fig. S5.** Influence of the ACN content of mobile phase on the retention factors and imprinting factor of GA analogues on the Ni<sup>2+</sup>-free OEG MIP (C5). HPLC conditions: column temperature, 25 °C; mobile phase, acetonitrile/acetate buffer (50 mmol L<sup>-1</sup>) (70/30, v/v); flow rate, 0.5 mL min<sup>-1</sup>; detection wavelength, 271 nm; injected volume, 20 μL.

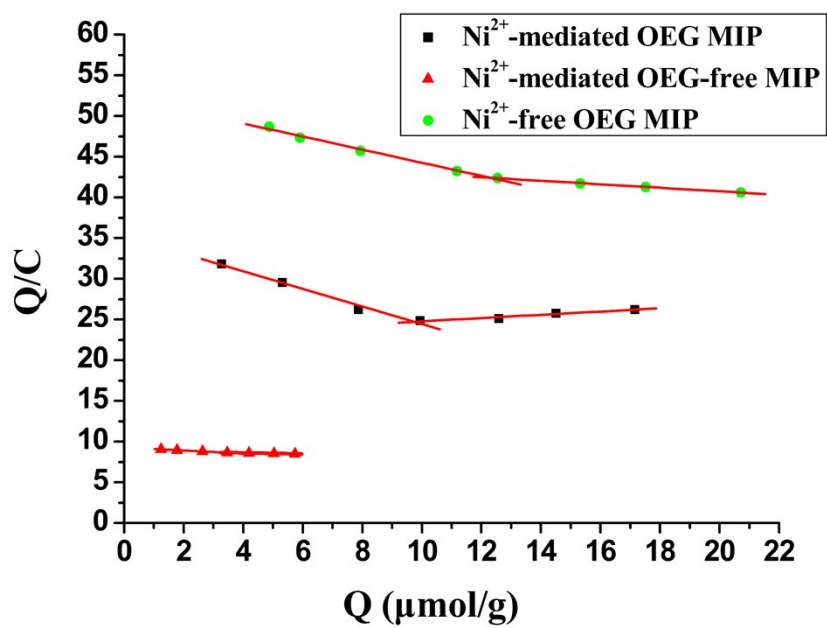

**Fig. S6.** Scatchard-Rosenthal plots for the  $\text{Ni}^{2+}$ -mediated OEG MIP (C11);  $\text{Ni}^{2+}$ -mediated OEG-free MIP (C15) and  $\text{Ni}^{2+}$ -free OEG MIP (C5).

**Table S1** Imprinting factors of Ni<sup>2+</sup>-mediated OEG MIP prepared with different ratio of OEG/4-VP

| MA-OEG/4-VP | EDMA | OEG | 4-VP | MIP | <i>k</i> | IF   |
|-------------|------|-----|------|-----|----------|------|
| 2.5:1       | 54%  | 33% | 17%  | C21 | 0.58     | 1.12 |
|             |      |     |      | C22 | 0.52     |      |
| 2:1         | 65%  | 23% | 15%  | C11 | 1.64     | 8.63 |
|             |      |     |      | C12 | 0.26     |      |
| 1.5:1       | 62%  | 23% | 12%  | C23 | 0.32     | 0.58 |
|             |      |     |      | C24 | 0.55     |      |
| 1:1         | 66%  | 17% | 13%  | C17 | 0.38     | 0.42 |
|             |      |     |      | C18 | 0.90     |      |
| 0:1         | 80%  | 0%  | 20%  | C15 | 1.01     | 0.94 |
|             |      |     |      | C16 | 1.07     |      |

Mobile phase: acetonitrile/acetate buffer (50 mmol L<sup>-1</sup>, pH 5.0) (70/30, v/v); flow rate, 0.5 mL min<sup>-1</sup>; detection wavelength, 271 nm; injected volume, 20 μL; temperature, 25 °C.

**Table S2** Effect of the ratio of template to nickel ions

| GA/Ni <sup>2+</sup> | Column | <i>k</i> | IF    |
|---------------------|--------|----------|-------|
| 2:1                 | C7-MIP | 0.60     | 0.34  |
|                     | C8-NIP | 1.74     |       |
| 1:1                 | C2-MIP | 1.96     | 11.53 |
|                     | C4-NIP | 0.17     |       |
| 1:0                 | C5-MIP | 4.16     | 0.95  |
|                     | C6-NIP | 4.39     |       |

Mobile phase, acetonitrile/acetate buffer (50 mmol L<sup>-1</sup>, pH 3.6) (90/10, v/v); flow rate, 0.5 mL min<sup>-1</sup>; detection wavelength, 271 nm; injected volume, 20 μL; temperature, 25 °C.
